# Supplementary material for: Theory of mind and joint action in Parkinson’s disease
Source: Springer Nature journal article supplement (doi:10.3758/s13415-018-0642-0), 2018-09-26
Supplement: MOESM1 [file 13415_2018_642_MOESM1_ESM.docx]

**Supplementary** Materials:

**Table S3.** **A)** Mean RTs in ms and mean accuracy (in %) for each flanker type for PD patients (PD) and healthy controls (HC) with high scores (HS) and low scores (LS) in the AT test for both joint and individual tasks; **B)** Mean RTs in ms and mean accuracy (in %) for each flanker type for PD patients (PD) and healthy controls (HC) with high scores (HS) and low scores (LS) in the EAT test for both joint and individual tasks; **C)** Mean RTs in ms and mean accuracy (in %) for each flanker type for PD patients (PD) and healthy controls (HC) in the classical Eriksen Flanker task. In brackets the SD of mean value for both RTs and accuracy.

| **Joint Task** | | | | | | | | | |
| --- | --- | --- | --- | --- | --- | --- | --- | --- | --- |
| **A** | | **Identical** | | **Compatible** | | **Neutral** | | **Incompatible** | |
| RT | % | RT | % | RT | % | RT | % |
| **PD** | **HS in AT (n =31)** | 1240 (453) | 97.18 (12.15) | 1246 (449) | 95.91 (9.81) | 1220 (403) | 97.32 (11.01) | 1345 (513) | 95.51 (14.81) |
| **LS in AT (n = 26)** | 1471 (681) | 93.08 (10.48) | 1491 (745) | 94.94 (16.17) | 1498 (701) | 98.46 (7.19) | 1438 (665) | 96.18 (10.86) |
| **HC** | **HS in AT (n = 36)** | 662 (220) | 96.26 (14.09) | 666 (208) | 96.51 (14.15) | 648 (165) | 94.99 (13.21) | 679 (210) | 90.50 (11.53) |
| **LS in AT (n = 21)** | 804 (367) | 91.37 (5.98) | 761 (436) | 96.31 (3.64) | 860 (461) | 90.64 (14.41) | 801 (361) | 87.96 (19.11) |
| **Individual Task** | | | | | | | | | |
|  | | **Identical** | | **Compatible** | | **Neutral** | | **Incompatible** | |
| RT | % | RT | % | RT | % | RT | % |
| **PD** | **HS in AT** | 1345 (563) | 99.24 (2.99) | 1365 (585) | 100.00 (0.00) | 1343 (578) | 99.62 (2.99) | 1345 (527) | 100 (0.00) |
| **LS in AT** | 1585 (762) | 97.35 (10.29) | 1612 (928) | 97.29 (14.73) | 1718 (837) | 95.48 (13.96) | 1570 (782) | 98.73 (12.96) |
| **HC** | **HS in AT** | 764 (359) | 98.78 (6.14) | 747 (275) | 99.91 (3.87) | 733 (303) | 99.84 (5.31) | 752 (285) | 98.47 (3.87) |
| **LS in AT** | 897 (512) | 94.59 (10.97) | 914 (584) | 95.21 (7.27) | 849 (426) | 95.33 (14.82) | 854 (402) | 93.75 (10.41) |

| **Joint Task** | | | | | | | | | |
| --- | --- | --- | --- | --- | --- | --- | --- | --- | --- |
| **B** | | **Identical** | | **Compatible** | | **Neutral** | | **Incompatible** | |
| RT | % | RT | % | RT | % | RT | % |
| **PD** | **HS in EAT (n = 33)** | 1230 (548) | 99.06 (11.24) | 1234 (556) | 98.82 (/9.73) | 1189 (462) | 100  (0.00) | 1201 (470) | 98.13 (13.35) |
| **LS in EAT (n = 24)** | 1508 (552) | 90.09 (11.70) | 1533 (626) | 94.01 (16.28) | 1566 (613) | 94.59 (11.95) | 1651 (599) | 92.58 (12.98) |
| **HC** | **HS in EAT (n = 30)** | 657 (263) | 95.52 (9.47) | 665 (262) | 97.61 (12.17) | 657 (247) | 93.56 (9.52) | 674 (271) | 88.33 (9.47) |
| **LS in EAT (n = 27)** | 775 (333) | 96.66 (14.15) | 753 (376) | 95.23 (10.93) | 798 (402) | 93.22 (16.18) | 773 (306) | 90.99 (17.73) |
| **Individual Task** | | | | | | | | | |
|  | | **Identical** | | **Compatible** | | **Neutral** | | **Incompatible** | |
| RT | % | RT | % | RT | % | RT | % |
| **PD** | **HS in EAT** | 1403 (635) | 99.31 (4.04) | 1435 (700) | 99.37 (5.80) | 1440 (662) | 97.85 (4.87) | 1372 (626) | 99.38 (2.90) |
| **LS in EAT** | 1525 (705) | 97.13 (10.40) | 1536 (846) | 98.32 (14.12) | 1618 (797) | 97.66 (14.12) | 1554 (692) | 99.70 (13.44) |
| **HC** | **HS in EAT** | 744 (326) | 98.28 (7.69) | 727 (270) | 98.32 (4.23) | 727 (313) | 98.17 (6.32) | 733 (274) | 97.07 (6.71) |
| **LS in EAT** | 889 (514) | 96.04 (9.29 | 899 (545) | 97.96 (6.42) | 829 (408) | 98.10 (12.83) | 850 (394) | 96.26 (7.60) |

| **CLASSICAL ERIKSEN FLANKER TASK** | | | | | | | | | |
| --- | --- | --- | --- | --- | --- | --- | --- | --- | --- |
| **C** | | **Identical** | | **Compatible** | | **Neutral** | | **Incompatible** | |
| RT | % | RT | % | RT | % | RT | % |
| **Two-choice task** | **PD (n=30)** | 1590 (793) | 93.89 (12.37) | 1584 (774) | 93.89 (8.74) | 1669 (877) | 93.61 (8.10) | 1686 (845) | 93.06 (8.78) |
| **HC (n=33)** | 793 (213) | 89.65 (10.63) | 830 (237) | 92.68 (9.72) | 822 (228) | 91.16 (7.20) | 854 (228) | 91.92 (8.71) |
